# Supplementary material for: Magnetically agitated continuous-flow tube reactors with aspartate ammonia-lyase immobilized on magnetic nanoparticles
Source: Royal Society of Chemistry journal article supplement (doi:10.1039/d2re00507g), 2023-01-01
Supplement: d2re00507g1.pdf [file d2re00507g1.pdf]

## Electronic Supplementary Information

### Magnetically Agitated Continuous Flow Tube Reactors with Aspartate Ammonia-Lyase Immobilized on Magnetic Nanoparticles

Ali O. Imarah, Fausto M. W. G. Silva, Naran Bataa, Balázs Decsi, Diána Balogh-Weiser, and László Poppe

**Table S1**  $\zeta$ -Potential of the aspartate ammonia-lyase (AAL) and the MNP carriers without and with AAL<sup>a</sup>

| Sample     | $\zeta$ -Potential (mV) |
|------------|-------------------------|
| native AAL | -25.5±2.4               |
| GDE-MNP    | -24.2±1.0               |
| AAL-MNP    | -15.1±0.2               |

<sup>a</sup> Measurement conditions: L-aspartate (0.125 mg mL<sup>-1</sup>), or the corresponding MNPs (0.25 mg mL<sup>-1</sup>) in Tris buffer (50 mM, pH= 8.8), 25 °C.

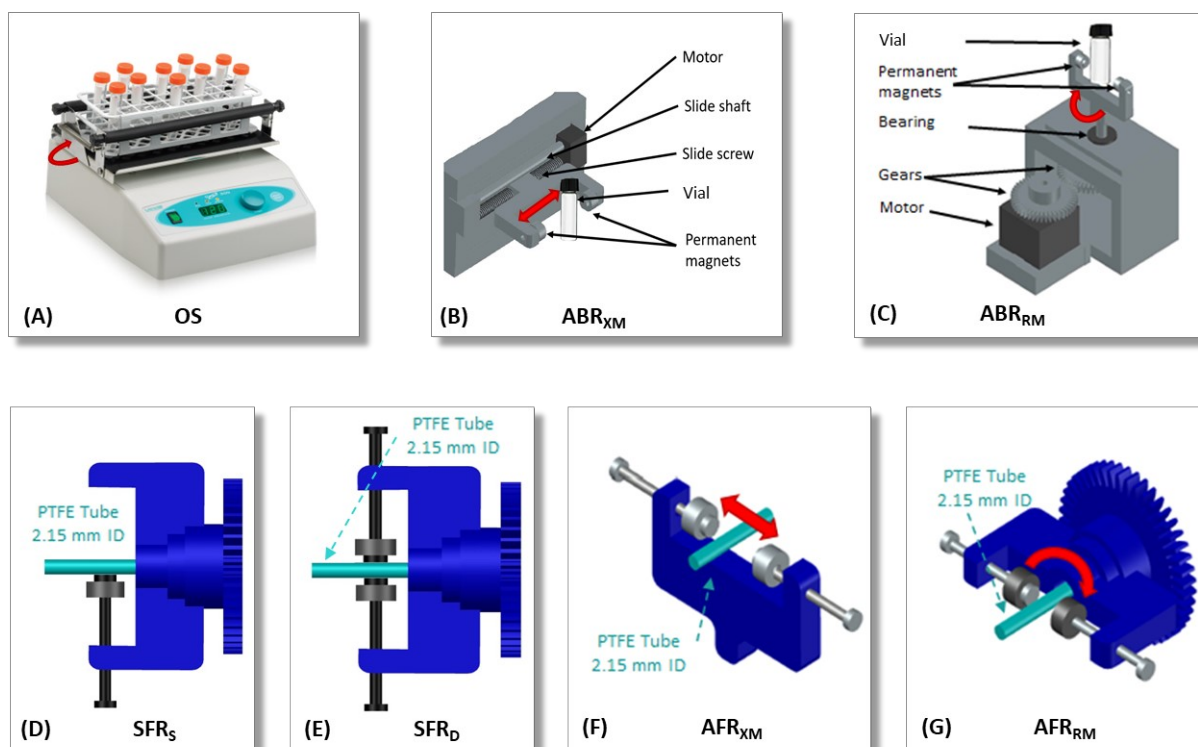

**Figure S1.** Modes of the reactors for the MNPs-AAL-catalysed biotransformations

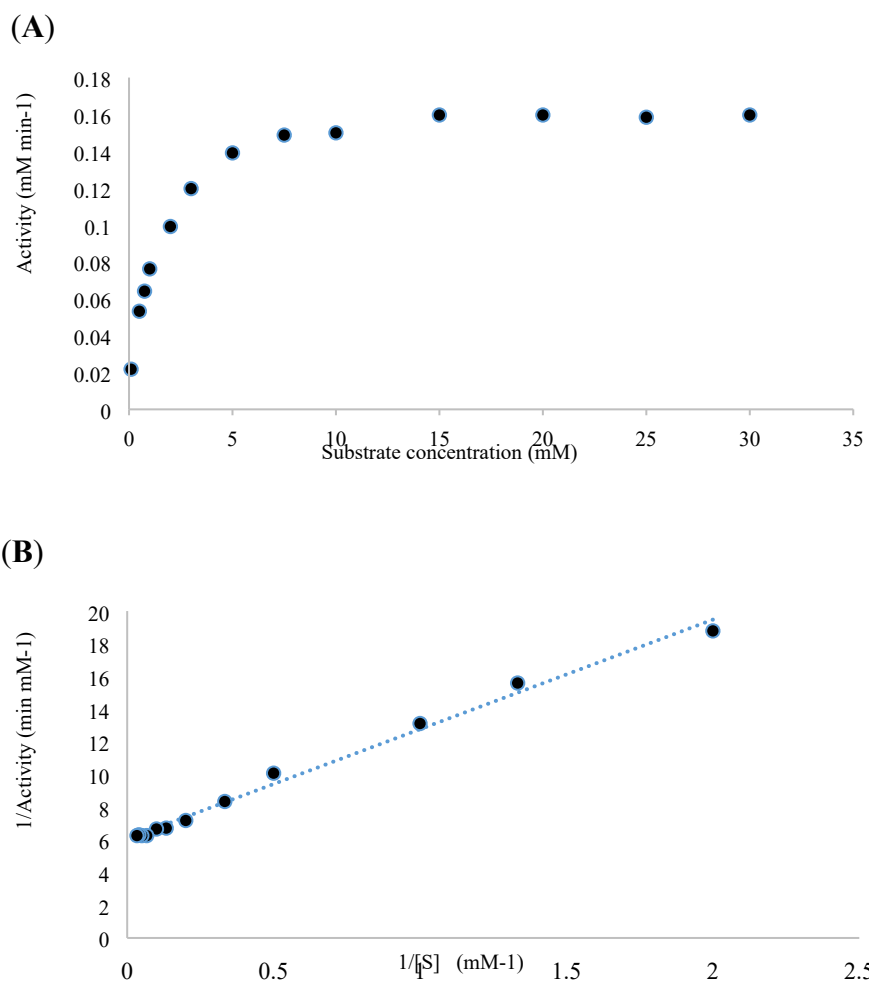

**Figure S2.** The (A) Michaelis-Menten curve and the (B) Lineweaver-Burk linearization for determining the apparent kinetic parameters of the aspartate ammonia-lyase immobilized on magnetic nanoparticles (AAL-MNP) in rotationally agitated flow reactor (AFR<sub>RM</sub>)

---
